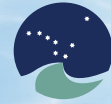

## Contribution to Special Issue: 'Towards a Broader Perspective on Ocean Acidification Research Part 2'

### Original Article

# Effects of pCO<sub>2</sub> on photosynthesis and respiration of tropical scleractinian corals and calcified algae

S. Comeau<sup>1,2\*</sup>, R. C. Carpenter<sup>1</sup>, and P. J. Edmunds<sup>1</sup>

<sup>1</sup>Department of Biology, California State University, 18111 Nordhoff Street, Northridge, CA 91330-8303, USA

<sup>2</sup>ARC Centre of Excellence for Coral Reef Studies, School of Earth and Environment & Oceans Institute, The University of Western Australia, 35 Stirling Highway, Crawley, WA 6009, Australia

\*Corresponding author. tel: +61 8 6488 3644; e-mail: [steve.comeau@uwa.edu.au](mailto:steve.comeau@uwa.edu.au)

Comeau, S., Carpenter, R. C., and Edmunds, P. J. Effects of pCO<sub>2</sub> on photosynthesis and respiration of tropical scleractinian corals and calcified algae. – ICES Journal of Marine Science, 74: 1092–1102.

Received 15 October 2015; revised 10 December 2015; accepted 15 December 2015; advance access publication 1 February 2016.

The effects of ocean acidification (OA) on coral reefs have been studied thoroughly with a focus on the response of calcification of corals and calcified algae. However, there are still large gaps in our knowledge of the effects of OA on photosynthesis and respiration of these organisms. Comparisons among species and determination of the functional relationships between pCO<sub>2</sub> and either photosynthesis or respiration are difficult using previously published data, because experimental conditions typically vary widely between studies. Here, we tested the response of net photosynthesis, gross photosynthesis, dark respiration, and light-enhanced dark respiration (LEDR) of eight coral taxa and seven calcified alga taxa to six different pCO<sub>2</sub> levels (from 280 to 2000 μatm). Organisms were maintained during 7–10 days incubations in identical conditions of light, temperature, and pCO<sub>2</sub> to facilitate comparisons among species. Net photosynthesis was not affected by pCO<sub>2</sub> in seven of eight corals or any of the algae; gross photosynthesis did not respond to pCO<sub>2</sub> in six coral taxa and six algal taxa; dark respiration also was unaffected by pCO<sub>2</sub> in six coral and six algae; and LEDR did not respond to pCO<sub>2</sub> in any of the tested species. Overall, our results show that pCO<sub>2</sub> levels up to 2000 μatm likely will not fertilize photosynthesis or modify respiration rates of most of the main calcifiers on the back reef of Moorea, French Polynesia.

**Keywords:** algae, coral, ocean acidification, photosynthesis, respiration.

## Introduction

Over the last decade, a growing number of studies have focused on the impact of ocean acidification (OA) on the physiology of tropical coral reef organisms. OA, which is caused by the dissolution of anthropogenic CO<sub>2</sub> in the oceans, leads to modifications of the carbonate chemistry of seawater that cause a decrease in pH, an increase in bicarbonate ion concentration, and a decrease in both carbonate ion concentration and calcium carbonate saturation state (Ω) (Feely *et al.*, 2004). Because corals and calcifying algae have the potential to produce large structures made of calcium carbonate, most of research on the effects of OA on coral reefs has focused on calcification of these organisms. For most species calcification likely will decline with OA, although some species appear insensitive over the range of conditions investigated (Takahashi and Kurihara 2013; Comeau *et al.* 2014). The effects of pCO<sub>2</sub> on respiration and photosynthesis of corals and calcifying macroalgae have received

less attention than calcification, although there are reasons to expect the effects could be substantial (e.g. Anthony *et al.*, 2008).

For example, it has been suggested that aerobic respiration will increase under OA conditions to supply the increased energy demands associated with maintaining calcification in a chemical environment that is thermodynamically less favourable to mineralization (McCulloch *et al.*, 2012). However, for corals, empirical evidence shows that the effects of elevated pCO<sub>2</sub> on aerobic respiration are equivocal, with, for example, no effects of high pCO<sub>2</sub> reported on dark respiration of *Stylophora pistillata* (Reynaud *et al.*, 2003), *Acropora eurystroma* (Schneider and Erez, 2006), and *A. formosa* (Crawley *et al.*, 2010), while a decrease in respiration has been reported for massive *Porites* spp. (Edmunds, 2012), *A. millepora* (Kaniewska *et al.*, 2012), and larvae of *P. astreoides* (Albright and Langdon, 2011). In calcifying algae, there are only a few studies addressing the response of respiration to pCO<sub>2</sub>, and in

these cases there generally is no effect of increasing pCO<sub>2</sub> (e.g. Semesí *et al.*, 2009; Martin *et al.*, 2013), but contrasting results such as an increase in respiration at elevated pCO<sub>2</sub> also have been reported, for example, on *Halimeda digitata* at CO<sub>2</sub> vents (Vogel *et al.*, 2015).

In addition to aerobic respiration, photosynthesis also could be affected by changes in the carbonate chemistry of seawater caused by OA, because an increase in the concentration of dissolved inorganic carbon [C<sub>T</sub>] in seawater (mostly in the bicarbonate form) could favour photosynthesis by increasing bicarbonate and dissolved CO<sub>2</sub> availability (Leggat *et al.*, 1999; Mackey *et al.*, 2015). For tropical reef corals, the effect of OA on net photosynthesis has received more attention than the effects on respiration, and a recent meta-analysis based on eleven studies revealed that the mean effect size of CO<sub>2</sub> on coral photosynthesis was not statistically discernible from zero (Kroeker *et al.*, 2013). Among the growing number of studies that have been conducted to explore the effects of pCO<sub>2</sub> on coral photosynthesis contrasting results such as a net photosynthesis decreases at 1180 µatm pCO<sub>2</sub> (Kaniewska *et al.*, 2012), an increase at 760 µatm (Reynaud *et al.*, 2003), and no effect (Takahashi and Kurihara, 2013) have for example been found. In contrast, for calcifying reef algae, most studies have reported a reduction of photosynthesis for a decrease in pH ≤ 0.5 unit ( $n = 11$  studies; Kroeker *et al.*, 2013).

To date, most experiments addressing the effects of elevated pCO<sub>2</sub> on respiration and photosynthesis of tropical corals and algae have been performed on only a few species, and have been conducted using experimental temperatures, irradiances, carbonate chemistry manipulations (CO<sub>2</sub> vs. acid), and exposure times that differ greatly among studies. For example, the photosynthesis of *A. intermedia* was studied at irradiance of 700–1200 µmol quanta m<sup>-2</sup> s<sup>-1</sup> (Anthony *et al.*, 2008), while the photosynthesis of *S. pistillata* was determined at irradiance of 380 µmol quanta m<sup>-2</sup> s<sup>-1</sup> (Reynaud *et al.*, 2003). Therefore, high variation among studies in treatment conditions makes it difficult to compare results among species or to engage in synthetic analyses, and with only a few species involved in studies to date, it is challenging to evaluate the biological meaning of among species variation. Species-specific morphologies, for example, could affect the mass transfer capabilities for important metabolites associated with respiration and photosynthesis including dissolved inorganic carbon, nutrients, and oxygen (Patterson, 1992; Jokiel, 2011). Furthermore, coral species that calcify rapidly may be more sensitive to elevated pCO<sub>2</sub> than species that calcify slowly, potentially because rapid calcification has a greater requirement for metabolic energy to export protons from the site of calcification (Rodolfo-Metalpa *et al.*, 2010; Comeau *et al.*, 2014). Previous studies of the effects of elevated pCO<sub>2</sub> on the metabolism of corals and algae typically have only employed two or three pCO<sub>2</sub> treatments, which greatly restricts the capacity to test for curvilinear relationships between the metabolism and pCO<sub>2</sub>.

This present research was designed to test two hypotheses: (i) photosynthesis of corals and calcifying algae is not affected by seawater pCO<sub>2</sub> and (ii) aerobic respiration is not affected by seawater pCO<sub>2</sub>. To strengthen the test of the primary hypotheses, experiments were conducted with multiple species of corals and algae to investigate differences between functional groups. The investigation was performed on eight coral taxa and seven calcifying algal taxa that were maintained under six pCO<sub>2</sub> levels from 280 to 2000 µatm, and under identical conditions of irradiance and seawater temperature. Corals and calcifying algae were selected to represent both the common calcifiers of the back reef of Moorea, French Polynesia,

and to contrast functional groups of organisms that previously differ in one aspect of their metabolism (i.e. calcification) when exposed to elevated pCO<sub>2</sub> (*sensu* Comeau *et al.*, 2014). Based on our earlier work showing that the response of calcification to pCO<sub>2</sub> differed between functional groups defined by contrasting morphologies or growth rates for both corals and algae, the same taxon were exploited in the present analysis. We contrasted the response of respiration and photosynthesis to high pCO<sub>2</sub> for corals assigned to branching vs. mounding functional groups, algae assigned to branching and encrusting functional groups, and both corals and algae assigned to either a fast or slow growing group as defined by empirical determinations of calcification rate (after Comeau *et al.*, 2014).

## Material and methods

### Sample collection and preparation

Our study combines results from two experiments conducted in Moorea, French Polynesia, in 2011 and 2012. The first experiment was performed from August to October 2011 on four corals (*Porites rus*, *Acropora pulchra*, *Pocillopora damicornis*, and *Pavona cactus*) and four algae (*Porolithon onkodes*, *Lithophyllum flavescens*, *Halimeda macroloba*, and *Halimeda minima*) (Comeau *et al.*, 2013a). To strengthen the diversity of calcifiers from each functional group investigated, a second experiment using an identical procedure was conducted from August to October 2012 with four different corals (massive *Porites* spp., *Psammocora profundacella*, *Porites irregularis*, and *Pocillopora verrucosa*) and three different calcified algae (*Hydrolithon reinboldii*, *Lithophyllum kotschyannum*, and *Neogoniolithon frutescens*). Each year, the experiment was separated into four consecutive trials, each lasting 2 weeks, corresponding to replications of the same experiment on different organisms/species. For each trial, individual organisms of each species were collected from mother colonies that were at least 30 m apart on the back reef on the North shore of Moorea at ~1–2 m depth. Samples of crustose coralline algae were collected by coring (3.5–4.5 cm diameter, for *P. onkodes* and *L. flavescens*); coral nubbins (3–5 cm long branches), *Halimeda* clumps (4–6 cm long thalli), and other coralline algae were hand collected. Freshly collected samples were returned to the Richard B. Gump South Pacific Research Station, where coral nubbins and coralline algae were glued with Z-Spar (A788 epoxy) to plastic bases (4 × 4 cm), and *Halimeda* clumps were attached to similar bases using nylon line.

After preparation and 2 d of recovery in a shallow tank supplied with flowing seawater, organisms were transferred for 2 weeks to an acclimation tank (Aqualogic Inc., San Diego, CA, USA) in which temperature and light were adjusted to provide conditions similar to those used during the subsequent treatments (27°C, ~700 µmol quanta m<sup>-2</sup> s<sup>-1</sup>). The objective of the incubation in the acclimation tank was to adjust the organisms to environmental conditions characterizing the laboratory system, thereby reducing unique effects of environmental conditions arising from the sites at which each sample was collected. New organisms were collected every 2 weeks to allow a similar 2-week acclimation period for each trial.

### Incubations and CO<sub>2</sub> control

A detailed summary of the incubation and CO<sub>2</sub> control technology can be found in Comeau *et al.* (2013). In brief, 36 individuals from one coral taxon and one algal taxon were allocated randomly to six of the twelve 150-l tanks (Aqualogic) (for a final density of six coral nubbins and six algal pieces in each tank). Individuals of another

coral and algal taxon were allocated to the remaining six tanks experiencing identical incubation conditions. For each trial, the six organisms per treatment and species were used to study the response of calcification (Comeau *et al.*, 2013, 2014) and two of these organisms were selected randomly for measurements of photosynthesis and respiration after 7–10 d of incubation (see below). Organisms were maintained under six pCO<sub>2</sub> level during 2 weeks in an open flow system (with seawater flowing in at ~100 ml min<sup>-1</sup>), then the experiment was repeated with different organisms from the same species. Water motion in the tank was provided by head pump (Rio 8HF, 2082 l h<sup>-1</sup>). The six CO<sub>2</sub> treatments targeted six values, corresponding to preindustrial (280 μatm), present day (400 μatm), a optimistic value expected by the end of the century (~550 μatm, ~representative concentration pathway [RCP] scenario 4.5, Moss *et al.*, 2010), an average for the end of the century (~700 μatm, ~RCP scenario 6.0), a pessimistic value expected by the end of the 21st century (~1000 μatm, ~RCP scenario 8.5), and an extreme value of 2000 μatm (which creates seawater conditions close to the saturation threshold with respect to aragonite [i.e.  $\dot{U}_{\text{arag}} \sim 1$ ]). Temperature in the tanks was maintained at 27°C, which was the mean *in situ* seawater temperature in September–October 2011–2012. Irradiance was provided by LED lamps (75-W, Sol LED Module, Aquillumination) on a 12:12 h light:dark photoperiod providing ~700 μmol photons m<sup>-2</sup> s<sup>-1</sup> of photosynthetically active radiation (PAR, measured below the seawater surface with a 4π quantum sensor LI-193 and a LiCor LI-1400 m). This irradiance was chosen to be saturating with respect to photosynthesis for corals and algae collected from 2 m depth, where saturating irradiances for photosynthesis typically are >400 μmol photons m<sup>-2</sup> s<sup>-1</sup> (Chalker, 1981; Chisholm, 2003).

### Carbonate chemistry

Seawater pH on the total scale (pH<sub>T</sub>) was measured daily in each tank at 08:00 and 18:00 h, using a pH meter (Orion, 3-stars mobile mounted with a Mettler DG 115-SC pH electrode) calibrated every 2 d on the total scale using Tris–HCl buffers (supplied by A. Dickson, SIO). pH<sub>T</sub> also was measured spectrophotometrically for all tanks once during each trial using the indicator dye m-cresol (Standard Operating Procedure 6b, Dickson *et al.*, 2007), which yielded results within ≤0.01 of pH values obtained with the pH meter. Total alkalinity (A<sub>T</sub>) also was measured every 2 d using open cell, potentiometric titrations (automatic titrator T50, Mettler-Toledo) on 50-ml samples collected the day of the measurement. Titration of certified reference materials (A. G. Dickson batch 105 and 108) yielded A<sub>T</sub> values within 3.5 μmol kg<sup>-1</sup> of certified values. The variables A<sub>T</sub>, pH<sub>T</sub>, temperature, and salinity (measured by a conductivity meter YSI 3100) were used to calculate carbonate chemistry parameters using the Seacarb package (Gattuso *et al.*, 2015) running in R software (R foundation for statistical computing).

### Respiration and net photosynthesis

In the middle of the 2-week incubation period (after 7–10 d), respiration and net photosynthesis were measured on four organisms per treatment and species that were randomly picked from the 12 organisms per treatment and species used during the two trials; the measurements took 4 d to complete. To determine net photosynthesis, one coral and one alga from each treatment were chosen randomly 2 h after the LED lamps switched on (i.e. at ~08:00 h, following “sunrise”), and were placed in separate 240-ml custom-made acrylic incubation chamber containing seawater from the

respective incubation tanks. Changes in dissolved oxygen were monitored during ~30 min incubations with PreSens dipping oxygen optodes (PSt3) connected to Fibox 3 transmitters (Precision Sensing GmbH, Germany). The oxygen probes were calibrated every morning using a 2-point calibration in water-saturated air (100%) and anoxic seawater created by supersaturating seawater with sodium dithionite (Na<sub>2</sub>S<sub>2</sub>O<sub>4</sub>). Temperature was held constant during incubations by circulating water in a water jacket surrounding the incubation chamber. Chambers were positioned on magnetic stir plates, and seawater flow inside the chambers was regulated with magnetic stir bar that created vigorous and turbulent water motion. A similar irradiance to that used during incubations (i.e. 700 μmol quanta m<sup>-2</sup> s<sup>-1</sup>) was maintained while the organisms were in the acrylic chambers by placing an LED lamp (75-W, Sol LED Module, Aquillumination) above the chambers. On the same day that net photosynthesis was measured, and after at least 2 h of darkness (i.e. after 20:00 h), dark respiration was measured using an identical procedure to that used for photosynthesis, except the chamber was kept in darkness.

During the first year of the experiment, only dark respiration and net photosynthesis were measured. In addition to these measurements, light-enhanced dark respiration (LEDR) was determined during the second year. LEDR was assumed to be equivalent to the dark respiration measured during the first ~15 min following total darkness immediately after net photosynthesis was recorded at 700 μmol quanta m<sup>-2</sup> s<sup>-1</sup>. This assumption relies on the stimulatory effect of photosynthesis on respiration continuing unabated for at least 15 min following the onset of darkness following exposure to light (Kaniewska *et al.*, 2012). The stimulatory effect presumably arises from the effects on aerobic respiration of high O<sub>2</sub> concentrations or increased supplies of metabolic substrates translocated from the *Symbiodinium* to the cnidarian host (Stambler, 2011). Gross photosynthesis then was determined by subtracting LEDR (expressed with a negative notation indicating O<sub>2</sub> uptake) from net photosynthesis to provide a value that is likely to be close to the actual gross photosynthesis (Barnes and Chalker, 1990). Net and gross photosynthesis, dark respiration, and LEDR were normalized to surface area and biomass (tissue dry weight) for corals and coralline algae. Surface area was determined by the aluminium foil technique (Marsh, 1970) or image analysis (Image J, US National Institutes of Health) of planar digital images. To measure biomass, organisms were fixed in 10% formalin in seawater for 48 h then decalcified in 5% HCl for 2–4 d. The tissue tunics left after skeletal dissolution were homogenized then dried for 24–48 h at 60°C before weighing. The technique normally employed to determine surface area of complex objects [i.e. wax dipping (Stimson and Kinzie, 1991) and aluminium foil (Marsh, 1970)] could not be applied to *Halimeda*, which readily dropped segments. Biomass normalization was not used for *P. cactus* because their delicate tissues were damaged during decalcification.

An Akaike information criterion (AIC) approach was used to determine if linear, logarithmic, or polynomial models best described the functional relationships of dark respiration, LEDR, net photosynthesis, and gross photosynthesis against pCO<sub>2</sub> for each species (see details in Comeau *et al.*, 2013). A linear relationship was fit to explore a “proportional effect” model for rising pCO<sub>2</sub> that could, for example, represent an increase in respiration associated with increasing cost of calcification; a logarithmic relationship was fit to explore a “disproportional effect” model associated, for example, with a saturation relationship against rising pCO<sub>2</sub>, and a second-order polynomial relationship was fit to explore a “threshold

effect” model in which an optimal pCO<sub>2</sub> would be associated with maximization of a metabolic process.

## Results

During experiments conducted in 2011 and 2012 organisms were maintained successfully in regulated conditions with pCO<sub>2</sub> treatments maintained at mean values of 259 ± 2, 380 ± 2, 516 ± 4, 693 ± 7, 986 ± 9, and 1971 ± 20 μatm (± SE, *n* = 380, Comeau *et al.*, 2014). These pCO<sub>2</sub> levels correspond to aragonite saturation states of 4.7, 3.8, 3.1, 2.6, 2.0, and 1.1 at a total alkalinity of ~2324 ± 3 μmol kg<sup>-1</sup>, temperature of ~27.1°C (SE < 0.1), and

salinity of ~36.1 (SE < 0.1). All corals and algae remained alive during the incubations and no bleaching was observed.

## Net photosynthesis

In both corals and calcifying algae, AIC analyses justified the use of linear regressions to represent the relationships between pCO<sub>2</sub> and net photosynthesis normalized separately to biomass and surface area (Figures 1 and 2, Supplementary Figures S1 and S2). For corals, the rates of net photosynthesis normalized to biomass at 400 μatm pCO<sub>2</sub> varied from a minimum of 1.27 ± 0.09 μg O<sub>2</sub> h<sup>-1</sup> mg<sup>-1</sup> in *Psammocora profundacella* to a maximum of 4.42 ± 0.27 μg

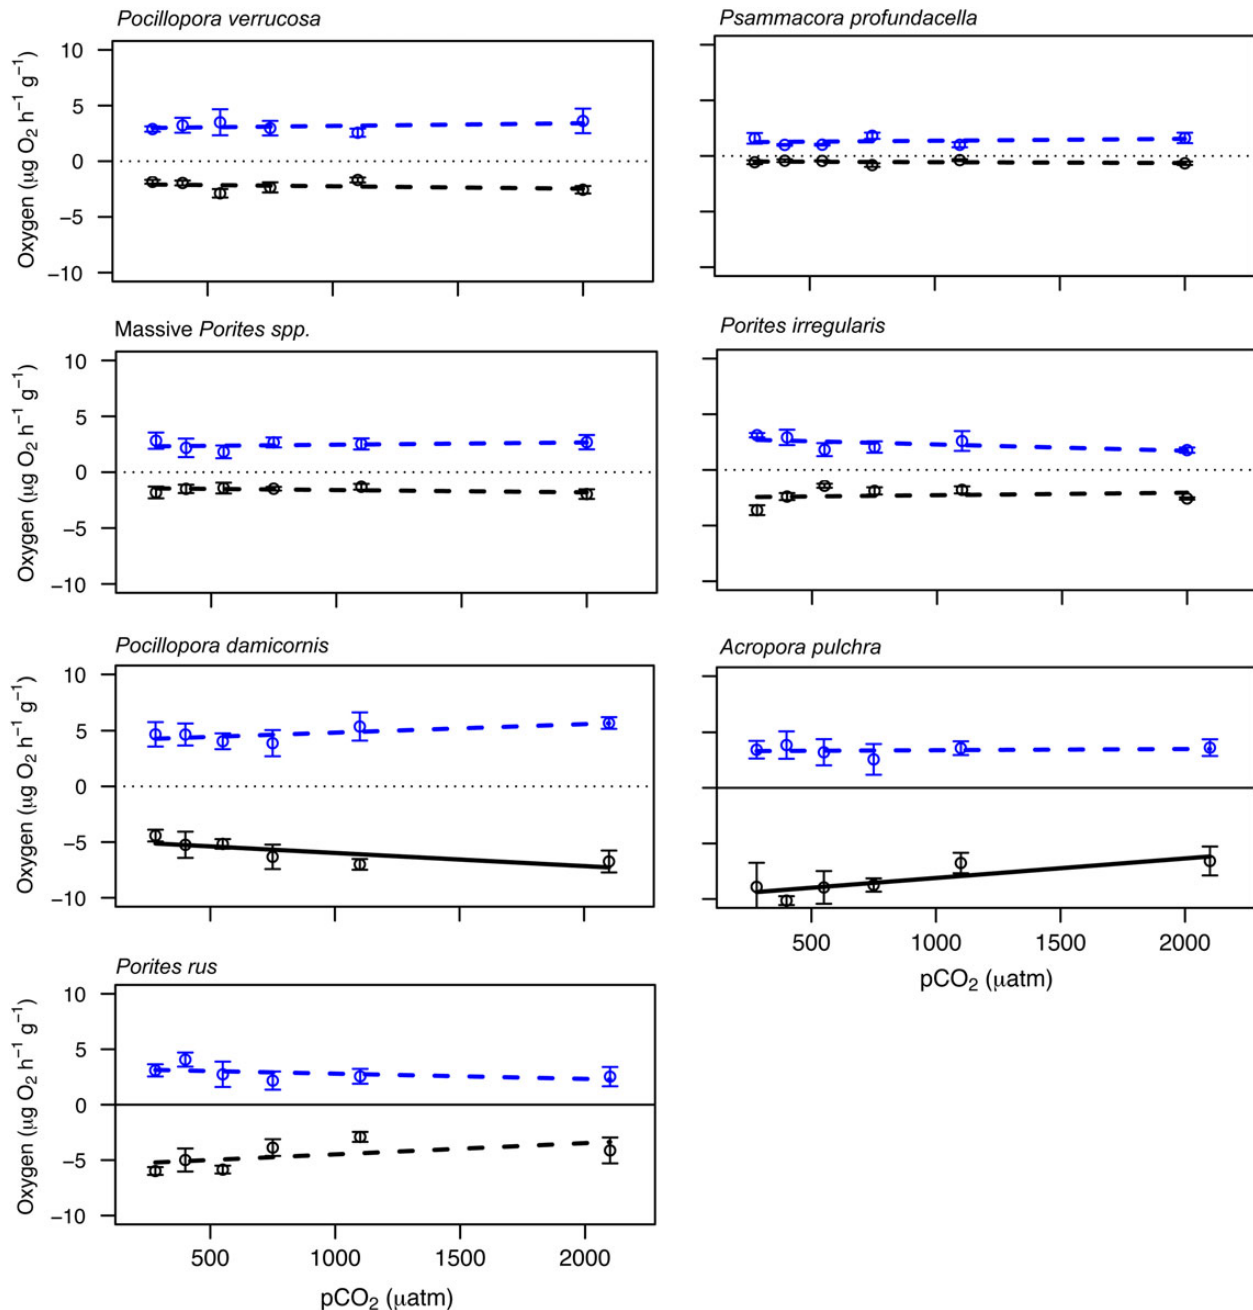

**Figure 1.** Biomass-normalized dark respiration (black lines) and net photosynthesis (blue lines) in corals as a function of pCO<sub>2</sub>. The points correspond to the mean rates at each tested pCO<sub>2</sub> (*n* = 4) and the vertical bars show ± SE. Solid lines show a significant *p*-value for the slope and dashed lines indicate a non-significant *p*-value for the slope.

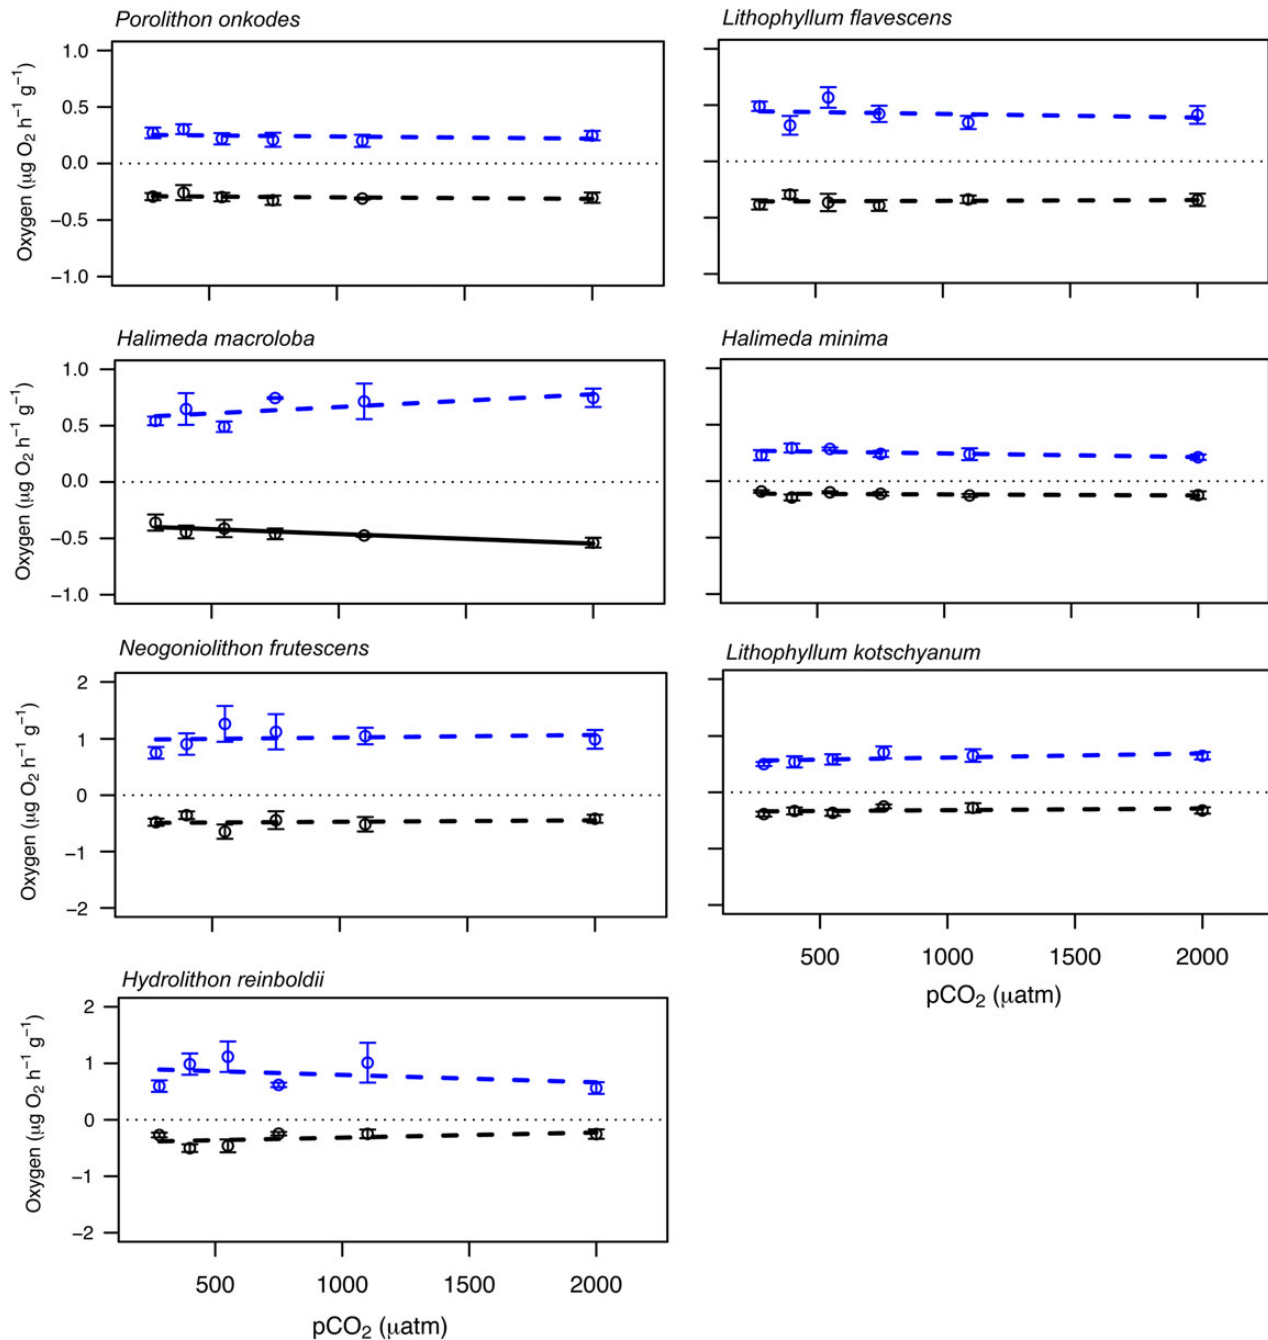

**Figure 2.** Biomass-normalized dark respiration (black lines) and net photosynthesis (blue lines) in algae as a function of  $p\text{CO}_2$ . The points correspond to the mean rates at each tested  $p\text{CO}_2$  ( $n = 4$ ) and the vertical bars show  $\pm$  SE. The solid line shows a significant  $p$ -value for the slope and dashed lines indicate a non-significant  $p$ -value for the slope. This figure is available in black and white in print and in colour at *ICES Journal of Marine Science* online.

$\text{O}_2 \text{ h}^{-1} \text{ mg}^{-1}$  in *Pocillopora damicornis* (Figure 1). No effect of  $p\text{CO}_2$  on net photosynthesis was detected as shown by non-significant slopes for the linear regressions between this dependent variable and  $p\text{CO}_2$  (Table 1). When normalized to surface area, the slopes of the linear regressions between net photosynthesis and  $p\text{CO}_2$  also were not significant for all species, except *Porites irregularis* for which photosynthesis decreased with  $p\text{CO}_2$  (Table 1, Supplementary Figure S1).

For algae, the slopes of biomass-normalized net photosynthesis against  $p\text{CO}_2$  were not significant in the five coralline algae and the two *Halimeda* species tested (Table 1, Figure 2). Biomass-

normalized net photosynthesis varied between taxa at  $400 \mu\text{atm } p\text{CO}_2$  from  $0.25 \mu\text{g O}_2 \text{ h}^{-1} \text{ mg}^{-1}$  in *Porolithon onkodes* to  $0.98 \mu\text{g O}_2 \text{ h}^{-1} \text{ mg}^{-1}$  in *Neogoniolithon frutescens*. Similar to biomass-normalized rates, there was no effect of  $p\text{CO}_2$  on surface-area-normalized net photosynthesis in the five species of coralline algae (Table 1, Supplementary Figure S2).

#### Dark respiration

The linear relationships of biomass-normalized dark respiration with  $p\text{CO}_2$  in corals did not have significant slopes for any coral species

**Table 1.** Parameters of the linear equations describing the relationship between net photosynthesis and pCO<sub>2</sub> (μatm) for the coral and algae studied.

| Species                          | Surface area-normalized net photosynthesis | p     | Biomass-normalized net photosynthesis     | p     |
|----------------------------------|--------------------------------------------|-------|-------------------------------------------|-------|
| Massive <i>Porites</i> spp.      | $-1.3 \times 10^{-3} \text{pCO}_2 + 38.1$  | 0.797 | $2.0 \times 10^{-4} \text{pCO}_2 + 2.3$   | 0.676 |
| <i>Porites irregularis</i>       | $-4.7 \times 10^{-4} \text{pCO}_2 + 22.1$  | 0.028 | $-5.7 \times 10^{-4} \text{pCO}_2 + 2.9$  | 0.168 |
| <i>Pocillopora verrucosa</i>     | $-1.7 \times 10^{-3} \text{pCO}_2 + 26.6$  | 0.521 | $2.4 \times 10^{-4} \text{pCO}_2 + 2.9$   | 0.644 |
| <i>Psammocora profundacella</i>  | $6.2 \times 10^{-3} \text{pCO}_2 + 45.9$   | 0.128 | $1.7 \times 10^{-4} \text{pCO}_2 + 1.2$   | 0.478 |
| <i>Porites rus</i>               | $2.2 \times 10^{-3} \text{pCO}_2 + 26.2$   | 0.621 | $-4.9 \times 10^{-4} \text{pCO}_2 + 3.3$  | 0.391 |
| <i>Acropora pulchra</i>          | $3.8 \times 10^{-3} \text{pCO}_2 + 11.9$   | 0.213 | $1.2 \times 10^{-4} \text{pCO}_2 + 3.3$   | 0.864 |
| <i>Pocillopora damicornis</i>    | $1.7 \times 10^{-3} \text{pCO}_2 + 24.1$   | 0.718 | $8.1 \times 10^{-4} \text{pCO}_2 + 4.1$   | 0.236 |
| <i>Pavona cactus</i>             | $-6.4 \times 10^{-3} \text{pCO}_2 + 24.7$  | 0.088 | n.d.                                      |       |
| <i>Porolithon onkodes</i>        | $-1.6 \times 10^{-3} \text{pCO}_2 + 29.2$  | 0.640 | $-1.7 \times 10^{-5} \text{pCO}_2 + 0.26$ | 0.584 |
| <i>Lithophyllum flavescens</i>   | $-3.0 \times 10^{-3} \text{pCO}_2 + 41.2$  | 0.639 | $-3.0 \times 10^{-5} \text{pCO}_2 + 0.45$ | 0.679 |
| <i>Neogoniolithon frutescens</i> | $8.1 \times 10^{-4} \text{pCO}_2 + 12.0$   | 0.645 | $5.4 \times 10^{-5} \text{pCO}_2 + 0.96$  | 0.735 |
| <i>Lithophyllum kotschyannum</i> | $1.7 \times 10^{-3} \text{pCO}_2 + 9.8$    | 0.170 | $7.2 \times 10^{-5} \text{pCO}_2 + 0.55$  | 0.254 |
| <i>Hydrolithon reinboldii</i>    | $-6.6 \times 10^{-4} \text{pCO}_2 + 13.9$  | 0.589 | $-1.5 \times 10^{-4} \text{pCO}_2 + 0.94$ | 0.285 |
| <i>Halimeda macroloba</i>        | N.d.                                       |       | $1.1 \times 10^{-5} \text{pCO}_2 + 0.56$  | 0.210 |
| <i>Halimeda minima</i>           | N.d.                                       |       | $-3.5 \times 10^{-5} \text{pCO}_2 + 0.28$ | 0.203 |

Parameters of the relationships are given for net photosynthesis normalized by surface area (cm<sup>2</sup>) and biomass (mg). *p*-values refer to the significance of the slope estimates in linear regressions.

**Table 2.** Parameters of the linear equations describing the relationship between night respiration and pCO<sub>2</sub> (μatm) for the coral and algae studied.

| Species                          | Surface area-normalized dark respiration  | p     | Biomass-normalized dark respiration       | p     |
|----------------------------------|-------------------------------------------|-------|-------------------------------------------|-------|
| Massive <i>Porites</i> spp.      | $-2.7 \times 10^{-3} \text{pCO}_2 - 22.1$ | 0.165 | $-2.0 \times 10^{-4} \text{pCO}_2 - 1.4$  | 0.428 |
| <i>Porites irregularis</i>       | $-1.1 \times 10^{-4} \text{pCO}_2 - 16.7$ | 0.947 | $2.2 \times 10^{-4} \text{pCO}_2 - 2.5$   | 0.516 |
| <i>Pocillopora verrucosa</i>     | $4.8 \times 10^{-5} \text{pCO}_2 - 18.3$  | 0.973 | $-2.2 \times 10^{-4} \text{pCO}_2 - 2.0$  | 0.392 |
| <i>Psammocora profundacella</i>  | $-2.2 \times 10^{-3} \text{pCO}_2 - 20.0$ | 0.299 | $-7.7 \times 10^{-5} \text{pCO}_2 - 0.5$  | 0.457 |
| <i>Porites rus</i>               | $-3.9 \times 10^{-3} \text{pCO}_2 - 42.5$ | 0.253 | $1.0 \times 10^{-3} \text{pCO}_2 - 5.5$   | 0.101 |
| <i>Acropora pulchra</i>          | $6.5 \times 10^{-4} \text{pCO}_2 - 36.7$  | 0.829 | $1.8 \times 10^{-3} \text{pCO}_2 - 9.9$   | 0.046 |
| <i>Pocillopora damicornis</i>    | $-3.2 \times 10^{-3} \text{pCO}_2 - 27.9$ | 0.321 | $-1.2 \times 10^{-3} \text{pCO}_2 - 4.8$  | 0.049 |
| <i>Pavona cactus</i>             | $2.9 \times 10^{-3} \text{pCO}_2 - 27.4$  | 0.062 | N.d.                                      |       |
| <i>Porolithon onkodes</i>        | $-1.1 \times 10^{-3} \text{pCO}_2 - 33.3$ | 0.582 | $-1.2 \times 10^{-5} \text{pCO}_2 - 0.29$ | 0.482 |
| <i>Lithophyllum flavescens</i>   | $9.5 \times 10^{-4} \text{pCO}_2 - 32.5$  | 0.668 | $7.1 \times 10^{-6} \text{pCO}_2 - 0.36$  | 0.799 |
| <i>Neogoniolithon frutescens</i> | $1.6 \times 10^{-4} \text{pCO}_2 - 5.5$   | 0.770 | $2.4 \times 10^{-5} \text{pCO}_2 - 0.49$  | 0.749 |
| <i>Lithophyllum kotschyannum</i> | $2.6 \times 10^{-4} \text{pCO}_2 - 6.4$   | 0.730 | $2.7 \times 10^{-5} \text{pCO}_2 - 0.34$  | 0.502 |
| <i>Hydrolithon reinboldii</i>    | $8.7 \times 10^{-4} \text{pCO}_2 - 6.1$   | 0.161 | $8.9 \times 10^{-5} \text{pCO}_2 - 0.40$  | 0.151 |
| <i>Halimeda macroloba</i>        | N.d.                                      |       | $-8.5 \times 10^{-5} \text{pCO}_2 - 0.38$ | 0.031 |
| <i>Halimeda minima</i>           | N.d.                                      |       | $-8.4 \times 10^{-6} \text{pCO}_2 - 0.11$ | 0.577 |

Parameters of the relationships are given for night respiration normalized by surface area and biomass. *p*-values refer to the significance of the slope estimates in linear regressions.

except *Pocillopora damicornis* ( $1.8 \times 10^{-3} \mu\text{g O}_2 \text{ h}^{-1} \text{ mg}^{-1} \mu\text{atm pCO}_2^{-1}$ ;  $p = 0.049$ ) and *Acropora pulchra* ( $-1.2 \times 10^{-3} \mu\text{g O}_2 \text{ h}^{-1} \text{ mg}^{-1} \mu\text{atm pCO}_2^{-1}$ ;  $p = 0.046$ ) (Table 2, Figure 1). Biomass-normalized dark respiration varied among coral species, as shown at 400 μatm pCO<sub>2</sub> where dark respiration ranged from  $-0.6 \pm 0.05 \mu\text{g O}_2 \text{ h}^{-1} \text{ mg}^{-1}$  (mean ± SE) in *Psammocora profundacella* to  $-9.2 \pm 0.35 \mu\text{g O}_2 \text{ h}^{-1} \text{ mg}^{-1}$  in *A. pulchra*. When normalized to surface area, dark respiration was not affected by pCO<sub>2</sub> in any coral taxa (Table 2, Supplementary Figure S1).

For algae, the relationships of biomass-normalized dark respiration with pCO<sub>2</sub> exhibited non-significant slopes in six of seven species (Table 2, Figure 2), and for the seventh (*H. macroloba*) dark respiration increased with pCO<sub>2</sub> (slope =  $8.5 \times 10^{-5} \mu\text{g O}_2 \text{ h}^{-1} \text{ mg}^{-1} \mu\text{atm pCO}_2^{-1}$ ;  $p = 0.031$ ). When dark respiration was normalized to surface area, it was not affected by pCO<sub>2</sub> in the five coralline algae (Table 2, Supplementary Figure S2).

### LED R and gross photosynthesis

For the four corals for which LEDR was measured in 2012 (Figure 3, Supplementary Figure S3), the slopes of the relationships for LEDR

(surface area and biomass normalized) against pCO<sub>2</sub> were not significant (Table 3). Similarly, in the three algae (*Neogoniolithon frutescens*, *Hydrolithon reinboldii*, and *Lithophyllum kotschyannum*) for which LEDR was measured, pCO<sub>2</sub> did not impact LEDR when normalized to surface area or biomass (Table 3, Figure 4, Supplementary Figure S4).

### Discussion

Using a large range of pCO<sub>2</sub> values and 15 species of common reef calcifiers on the shallow reefs of Moorea, the present study shows that net photosynthesis, dark respiration, LEDR, and gross photosynthesis of corals and calcified algae are largely insensitive to pCO<sub>2</sub> during short-term incubations. Furthermore, the general absence of an effect of pCO<sub>2</sub> on the tested parameters demonstrates that the categorization by functional groups (i.e. branching vs. mounding corals) does not drive the response of photosynthesis and respiration to elevated pCO<sub>2</sub> in these species. These results highlight that the likelihood that the increased availability of dissolved inorganic carbon [C<sub>T</sub>] in seawater due to OA will not increase photosynthesis in most corals and calcified algae (cf RIES *et al.*,

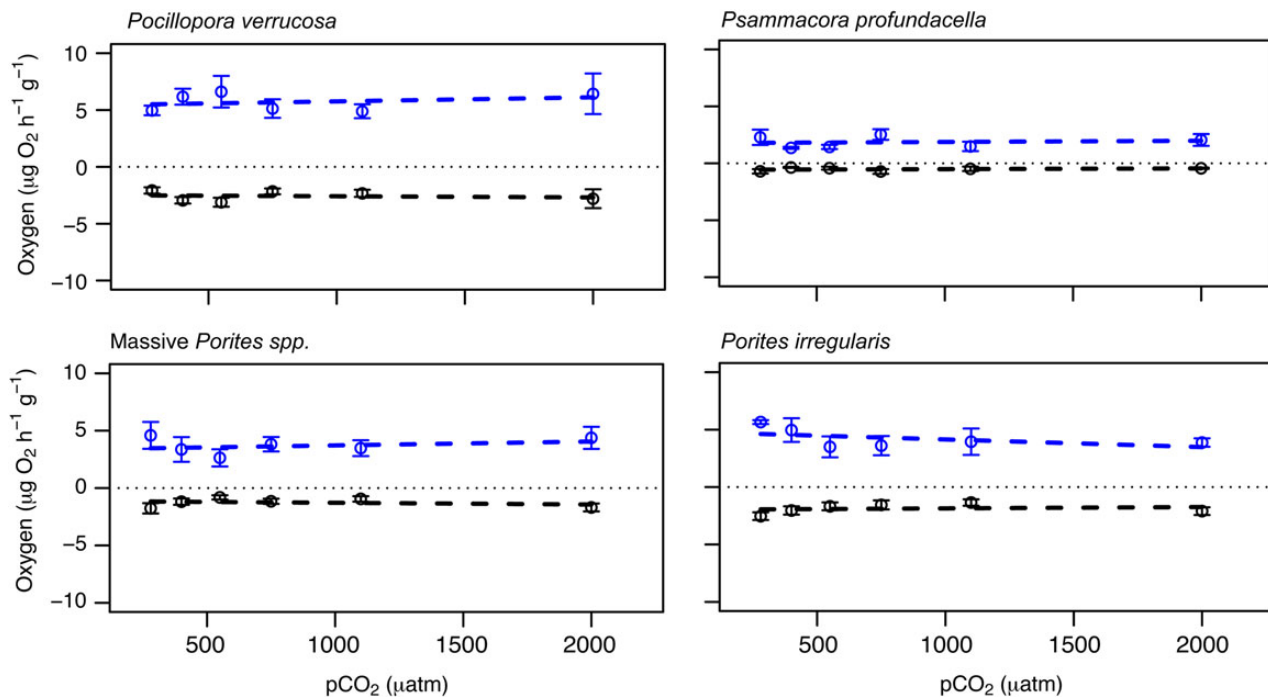

**Figure 3.** Biomass-normalized light respiration (black lines) and gross photosynthesis (blue lines) in corals as a function of pCO<sub>2</sub>. The points correspond to the mean rates at each tested pCO<sub>2</sub> ( $n = 4$ ) and the vertical bars show  $\pm$  SE. The solid line shows a significant  $p$ -value for the slope and dashed lines indicate a non-significant  $p$ -value for the slope. This figure is available in black and white in print and in colour at *ICES Journal of Marine Science* online.

**Table 3.** Parameters of the linear estimates of the relationship between LEDR and pCO<sub>2</sub> (µatm) for the coral and algae studied.

| Species                          | Surface area-normalized LEDR              | $p$   | Biomass-normalized LEDR                  | $p$   |
|----------------------------------|-------------------------------------------|-------|------------------------------------------|-------|
| Massive <i>Porites</i> spp.      | $-1.4 \times 10^{-3} \text{pCO}_2 - 19.9$ | 0.534 | $1.4 \times 10^{-4} \text{pCO}_2 - 1.1$  | 0.582 |
| <i>Porites irregularis</i>       | $1.0 \times 10^{-3} \text{pCO}_2 - 15.8$  | 0.726 | $-9.4 \times 10^{-5} \text{pCO}_2 - 2.0$ | 0.584 |
| <i>Pocillopora verrucosa</i>     | $2.6 \times 10^{-3} \text{pCO}_2 - 23.3$  | 0.193 | $1.2 \times 10^{-4} \text{pCO}_2 - 2.5$  | 0.722 |
| <i>Psammocora profundacella</i>  | $1.4 \times 10^{-3} \text{pCO}_2 - 20.6$  | 0.536 | $6.5 \times 10^{-5} \text{pCO}_2 - 0.57$ | 0.562 |
| <i>Neogoniolithon frutescens</i> | $-3.1 \times 10^{-4} \text{pCO}_2 - 4.1$  | 0.667 | $-2.0 \times 10^{-5} \text{pCO}_2 - 0.3$ | 0.749 |
| <i>Lithophyllum kotschyianum</i> | $6.7 \times 10^{-5} \text{pCO}_2 - 5.5$   | 0.921 | $1.4 \times 10^{-5} \text{pCO}_2 - 0.3$  | 0.697 |
| <i>Hydrolithon reinboldii</i>    | $8.8 \times 10^{-4} \text{pCO}_2 - 4.6$   | 0.179 | $7.3 \times 10^{-5} \text{pCO}_2 - 0.3$  | 0.322 |

Parameters of the relationships are given for LEDR normalized by surface area (cm<sup>2</sup>) and biomass (mg).  $p$ -values refer to the significance of the slope estimates in linear regressions.

2009). The outcome revealing that dark respiration is unaffected by elevated pCO<sub>2</sub> is inconsistent with the hypothesis that the metabolic costs of calcification, while rising due to the thermodynamic challenges of depositing CaCO<sub>3</sub> at low pH, is a factor limiting biogenic calcification under OA (*sensu* McCulloch et al., 2012), although this result could indicate variations in allocation of energy.

### Coral photosynthesis

Previous studies on the effects of elevated pCO<sub>2</sub> on coral photosynthesis have reported a variety of results ranging from inhibitory to stimulatory effects. A decrease of photosynthesis at high pCO<sub>2</sub> has been measured, for example, for *Acropora millepora* maintained under pCO<sub>2</sub> treatments of ~350, 685, and 1180 µatm (Kaniewska et al., 2012) as well as *A. intermedia* and *Porites lobata* at ~300, 600, and 1200 µatm pCO<sub>2</sub> (Anthony et al., 2008). In contrast, an increase of photosynthesis with pCO<sub>2</sub> was reported for *Stylophora pistillata* at 460 and 760 µatm (Reynaud et al., 2003). Recently, a study of coral metabolism at natural CO<sub>2</sub> vents also has shown

that photosynthesis of the coral *Porites* spp., *A. millepora*, and *P. damicornis* is enhanced at the elevated pCO<sub>2</sub> site (where pCO<sub>2</sub> reaches 862 µatm daily) compare with control conditions (Strahl et al., 2015). Similarly, Inoue et al. (2013) found that net photosynthesis of the soft coral *Sarcophyton elegans* present at CO<sub>2</sub> vents in both hard and soft corals could be due to long-term acclimation to elevated pCO<sub>2</sub> in contrast to the present study that did not allow any potential acclimation. However, similarly to the present results, some studies also have reported no effect of increasing pCO<sub>2</sub> on coral photosynthesis, for example, for *A. digitifera* incubated at pCO<sub>2</sub> levels between ~340 and 2140 µatm (Takahashi and Kurihara, 2013), and on entire coral reef communities maintained at 411, 647, and 918 µatm (Leclercq et al., 2002). Overall, the results from the aforementioned studies (and others) support a null effect size of pCO<sub>2</sub> on coral photosynthesis when evaluated in a meta-analytical framework (Kroeker et al., 2013). This outcome agrees with the present results.

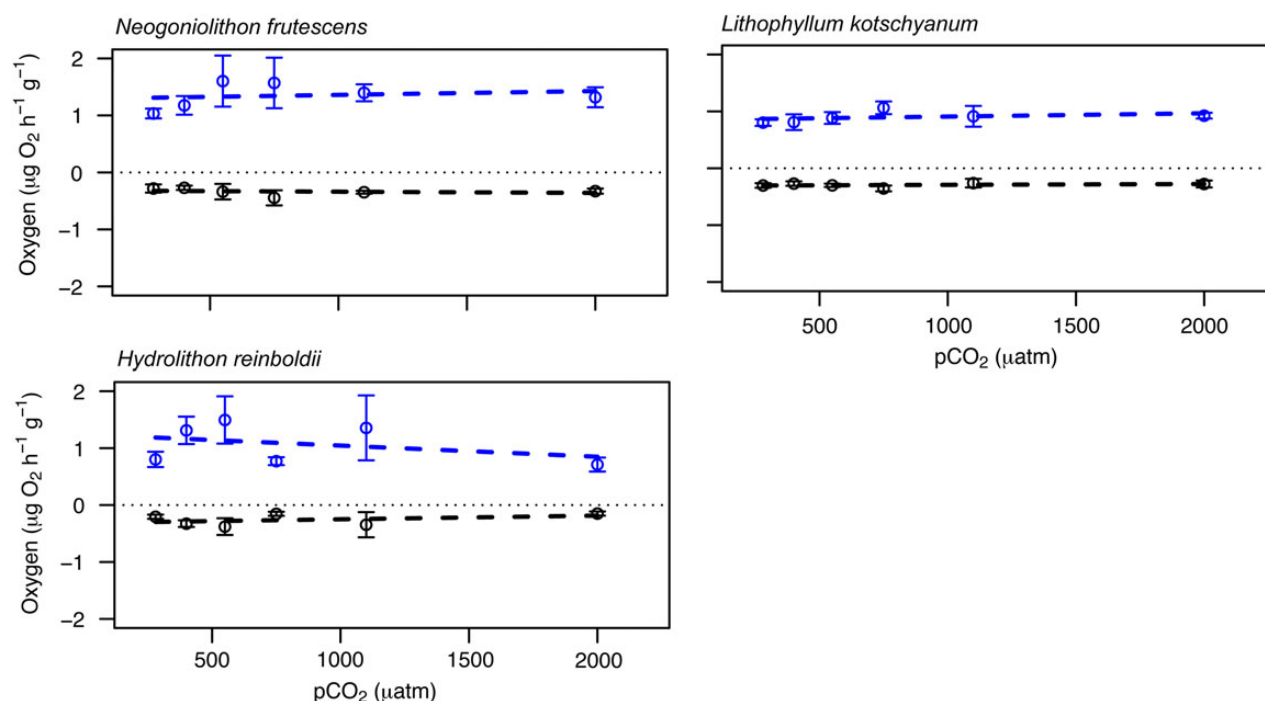

**Figure 4.** Biomass-normalized light respiration (black lines) and gross photosynthesis (blue lines) in algae as a function of pCO<sub>2</sub>. The points correspond to the mean rates at each tested pCO<sub>2</sub> ( $n = 4$ ) and the vertical bars show  $\pm$  SE. The solid line shows a significant  $p$ -value for the slope and dashed lines indicate a non-significant  $p$ -value for the slope. This figure is available in black and white in print and in colour at *ICES Journal of Marine Science* online.

For many plants, elevated pCO<sub>2</sub> has a “fertilization effect” on photosynthesis, because high pCO<sub>2</sub> alleviates carbon limitation at the Calvin Cycle and facilitates greater rates of photosynthesis compared with control conditions of ambient pCO<sub>2</sub> (e.g. Kirschbaum, 1994, Norby *et al.*, 2005, Vogel *et al.*, 2015). In the present study, elevated pCO<sub>2</sub> and increased concentrations of bicarbonate did not affect gross or net photosynthesis of corals. There are several mechanisms by which the symbiosis between scleractinian hosts and their symbiotic algae can reduce the potential for enhancement of carbon fixation by elevated concentrations of dissolved inorganic carbon (DIC). First, the lack of a fertilization effect of high pCO<sub>2</sub> on coral photosynthesis also serve, by default, to suggest that carbon fixation in corals could already be maximized under ambient pCO<sub>2</sub>. Second, *Symbiodinium* in reef corals are not in direct contact with seawater, as they reside within the gastroderm of corals in an intracellular membrane-enclosed compartment (Stambler, 2011). Spatial separation from the surrounding seawater and enclosure within two animal cell membranes is likely to reduce the direct effect of modifications of seawater DIC for photosynthesis. Third, *Symbiodinium* rely on a carbon concentration mechanism (CCM) that reduces their dependence on CO<sub>2</sub> uptake by diffusion and allow them to utilize carbon available in the bicarbonate form (Leggat *et al.*, 1999; Mackey *et al.*, 2015). Finally, external DIC is not the only source of carbon for photosynthesis by symbiotic corals, because host respiration likely provides some of the CO<sub>2</sub> that is used by *Symbiodinium* for photosynthesis, although the relative importance of this source of CO<sub>2</sub> is uncertain (Allemand *et al.*, 1998; Furla *et al.*, 2000).

Nevertheless, despite the isolation from ambient seawater of the symbiotic *Symbiodinium* in reef corals, high pCO<sub>2</sub> has been reported to enhance photosynthesis in some corals (cited above), and at least two studies suggest that there is a stimulatory role of increasing

bicarbonate ion concentrations in seawater for coral photosynthesis (Herfort *et al.*, 2008; Marubini *et al.*, 2008). One way to reconcile the present and previous results is to propose that corals have bicarbonate transporters (Zoccola *et al.*, 2015) that enhance the delivery of bicarbonate to the acidic symbiosome (pH = 4) surrounding each *Symbiodinium* cell, and these transports might vary in presence and expression level depending on species. Within the symbiosome, bicarbonate could then be converted into CO<sub>2</sub> through the effect of pH on the equilibrium reactions affecting DIC species, ultimately providing CO<sub>2</sub> that could be used by *Symbiodinium* for photosynthesis (Barott *et al.*, 2015). While the rate of such transport could be affected by increasing bicarbonate ion concentration, perhaps the moderate increase in bicarbonate associated with OA (i.e.  $\sim 10\%$  increase with a doubling of ambient pCO<sub>2</sub>) is not sufficient to enhance photosynthesis under conditions expected by the end of the century.

### Algal photosynthesis

In algae, as described above for scleractinians, there was no effect of high pCO<sub>2</sub> on net and gross photosynthesis in all coralline species and *Halimeda* species. Previous studies on algae have generated equivocal evidence of the effects of pCO<sub>2</sub> on photosynthesis. A strong decrease in net photosynthesis at elevated pCO<sub>2</sub> has been measured in *Porolithon onkodes* (Anthony *et al.*, 2008), but another study on the same species (Johnson *et al.*, 2014) as well as the present study did not detect an effect of high pCO<sub>2</sub> (to 2000  $\mu$ atm). In contrast, an increase in photosynthesis has been reported in a few algal species including *Corallina officinalis* at pH 7.7 (Yildiz *et al.*, 2013) and *Halimeda cylindrica* at 660  $\mu$ atm pCO<sub>2</sub> (Sinutok *et al.*, 2011). More complex responses than the aforementioned linear effects as a result of elevated pCO<sub>2</sub> have been found for the coralline alga *Lithothamnion corallioides*, in which



the response of photosynthesis to pCO<sub>2</sub> was curvilinear (Noisette et al., 2013). In yet another example, which yielded results similar to the present study, photosynthesis was unaffected by elevated pCO<sub>2</sub> (to ~2000 μatm pCO<sub>2</sub>) in the temperate algae *C. officinalis* (Cornwall et al., 2012; Hofmann et al., 2012) and *Arthrocardia corymbosa* (Cornwall et al., 2013) (Table 4).

The diversity of responses of photosynthesis to elevated pCO<sub>2</sub> in macroalgae reported in the literature likely reflects species-specific effects as well as different light, exposure time, and nutrient conditions between studies (Hofmann and Bischof, 2014). While, it also has been suggested that differences in mineralized structure composition (e.g. intracellular vs. extracellular calcification and calcite vs. aragonite) could influence the response of photosynthesis to elevated pCO<sub>2</sub> in marine algae (Hofmann and Bischof, 2014), the present results do not support this hypothesis, as species with similar mineral structures responded to elevated pCO<sub>2</sub> in a different manner. Although the present study cannot address the mechanistic bases of the lack of pCO<sub>2</sub> effects on photosynthesis and respiration of the algal taxa studied, overall the results are consistent with two hypotheses that are not mutually exclusive. First, marine calcifying algae may possess a CCM that allows them to utilize bicarbonate as a carbon source for photosynthesis (Digby, 1977); therefore, the absence of a pCO<sub>2</sub> effect on photosynthesis may reflect that enough DIC is already available for this physiological process. Second, calcification and photosynthesis are tightly coupled in calcifying algae, largely through the use of internal CO<sub>2</sub> by photosynthesis that causes an increase in intracellular pH and creates chemical conditions favouring calcification (Borowitzka and Larkum, 1987; De Beer and Larkum, 2001). The absence of an effect of pCO<sub>2</sub> on algal photosynthesis could reflect the presence of large quantities of intracellular dissolved CO<sub>2</sub> through calcification reaction that favour CO<sub>2</sub> formation (Frankignoulle et al., 1994), stimulating in return photosynthesis. Although reduced calcification under OA could reduce this CO<sub>2</sub> source, it could be compensated by the increased of seawater dissolved CO<sub>2</sub>.

### Coral respiration

For most coral taxa investigated, we did not measure an effect of pCO<sub>2</sub> on dark respiration. Only the dark respiration of *P. damicornis* and *A. pulchra* normalized to biomass was affected by pCO<sub>2</sub>. These results are similar to the absence of an effect of pCO<sub>2</sub> on dark respiration in the corals *Stylophora pistillata* (Reynaud et al., 2003), *A. eurytoma* (Schneider and Erez, 2006), and *A. digitifera* (Takahashi and Kurihara, 2013). In contrast, dark respiration of massive *Porites* spp. (Edmunds, 2012), *A. millepora* (Kaniewska et al., 2012), larvae of *Porites astreoides* (Albright and Langdon, 2011), and larvae of *P. damicornis* (Rivest and Hofmann, 2014) all decreased when

exposed to elevated pCO<sub>2</sub>. For LEDR, in the four coral species for which it was measured, it was not affected by pCO<sub>2</sub>. This is a similar outcome to the one reported for *A. millepora* incubated between 260 and 1350 μatm pCO<sub>2</sub> (Kaniewska et al., 2012), but it contrasts with the increase in LEDR reported for *A. formosa* exposed to 380–1100 μatm pCO<sub>2</sub> (Crawley et al., 2010).

Elevated aerobic respiration as a function of OA could result from higher cost of functioning at elevated pCO<sub>2</sub> caused, for example, by perturbed active cellular transport (e.g. Thomsen and Melzner, 2010), or an increasing cost of calcification (McCulloch et al., 2012). In contrast, a decrease in respiration at low pH reflects a reduction in metabolic costs, and perhaps explicit metabolic depression (Pörtner et al., 2004). The response of aerobic respiration to high pCO<sub>2</sub> in the present study was quite variable as has been reported previously (e.g. Schneider and Erez, 2006; Edmunds, 2012), notably with reduced respiration in *A. pulchra*, elevated respiration in *P. damicornis*, and null effects in all other species. A null effect on respiration could have reflected multiple pathways of metabolic responses, ranging from a simply case of no effect, to more complex cases involving energetic trade-offs among critical processes that change the allocation of energy to individual functions while conserving the overall metabolic costs (Pan et al., 2015). Further work would be necessary to elucidate which pathway of allocation of energy corals use when incubated under elevated pCO<sub>2</sub> conditions. As it has been done in sea urchins (Pan et al., 2015), such study would require characterization of the effects of pCO<sub>2</sub> on a large amount of physiological parameters such as calcification, protein synthesis, gene expression, and enzyme activities.

### Algal respiration

Similarly to the effects of pCO<sub>2</sub> on dark respiration of corals, dark respiration and LEDR of most algae were not affected by pCO<sub>2</sub>, and it was only in *H. macroloba* that a positive response of respiration to increasing pCO<sub>2</sub> was detected. Comparable results have been found in previous studies, for instance with no effect of pCO<sub>2</sub> on the respiration of *P. onkodes* (Anthony et al., 2008), *C. elongata* (Egilsdottir et al., 2012; Noisette et al., 2013), and *C. officinalis* (Hofmann et al., 2012). Non-linear responses of dark respiration as a function of variable pCO<sub>2</sub> have been reported in *Lithothamnion corallioides* that exhibited minimum respiration rates at 550 and 750 μatm and maximum at 380 and 1000 μatm (Noisette et al., 2013). As for corals, the varying responses of algal respiration to pCO<sub>2</sub> reported here could be caused by a variety of mechanisms such as perturbed active cellular transport, metabolic depression, increase in the cost of calcification, or variations in allocation of energy to competing metabolic pathways.

**Table 4.** Parameters of the linear estimates of the relationship between gross photosynthesis and pCO<sub>2</sub> (μatm) for the coral and algal studied.

| Species                          | Surface area-normalized gross photosynthesis | p     | Biomass-normalized gross photosynthesis   | p     |
|----------------------------------|----------------------------------------------|-------|-------------------------------------------|-------|
| Massive <i>Porites</i> spp.      | $-2.7 \times 10^{-3} \text{pCO}_2 + 57.9$    | 0.672 | $3.4 \times 10^{-4} \text{pCO}_2 + 3.4$   | 0.627 |
| <i>Porites irregularis</i>       | $-5.7 \times 10^{-3} \text{pCO}_2 + 37.9$    | 0.099 | $-6.6 \times 10^{-4} \text{pCO}_2 + 4.8$  | 0.272 |
| <i>Pocillopora verrucosa</i>     | $-4.3 \times 10^{-3} \text{pCO}_2 + 49.9$    | 0.174 | $3.6 \times 10^{-4} \text{pCO}_2 + 5.4$   | 0.631 |
| <i>Psammocora profundacella</i>  | $4.8 \times 10^{-3} \text{pCO}_2 + 66.5$     | 0.332 | $1.1 \times 10^{-4} \text{pCO}_2 + 1.8$   | 0.750 |
| <i>Neogoniolithon frutescens</i> | $1.1 \times 10^{-3} \text{pCO}_2 + 16.0$     | 0.617 | $7.4 \times 10^{-5} \text{pCO}_2 + 1.29$  | 0.719 |
| <i>Lithophyllum kotschyannum</i> | $1.6 \times 10^{-3} \text{pCO}_2 + 15.2$     | 0.319 | $5.8 \times 10^{-5} \text{pCO}_2 + 0.85$  | 0.481 |
| <i>Hydrolithon reinboldii</i>    | $-1.4 \times 10^{-3} \text{pCO}_2 + 18.5$    | 0.374 | $-2.3 \times 10^{-6} \text{pCO}_2 + 1.26$ | 0.289 |

Parameters of the relationships are given for gross photosynthesis normalized by surface area (Surface) and biomass (Biomass). Gross photosynthesis was estimated by subtracting light respiration to net photosynthesis in four corals (massive *Porites* spp., *Porites irregularis*, *Pocillopora verrucosa*, and *Psammocora profundacella*) and three algae (*Neogoniolithon frutescens*, *Lithophyllum kotschyannum*, and *Hydrolithon reinboldii*). p-values refer to the significance of the slope estimates in linear regressions.

## Conclusion

The present study shows overall that the respiration and photosynthesis of corals and algae is relatively insensitive to increasing pCO<sub>2</sub> between 280 and 2000 μatm during 7–10 d incubations. The link between sensitivity to pCO<sub>2</sub> and respiration or photosynthesis showed different responses, because some species (*P. damicornis* and *H. macroloba*) appear to up-regulate their respiration in association with calcification (Comeau *et al.*, 2013), while other species (e.g. massive *Porites* spp.) did not. The present results suggest that the effects of elevated pCO<sub>2</sub> on respiration and photosynthesis are equivocal at best, and potentially trivial. While effects were detected for a few traits in some species, these effects would lead to only small absolute changes within the range of pCO<sub>2</sub> increases expected in the next 100 years. Against this backdrop, it would be valuable to revisit the mechanistic framework within which the effects of OA on calcified taxa are viewed, specifically to revisit the likelihood that the negative effects are modulated through perturbations in the absolute supply and demand for metabolic energy.

## Supplementary data

Supplementary material is available at the ICES/JMS online version of the manuscript.

## Acknowledgements

Thanks are due to C. Cornwall for his helpful comments on an earlier draft of this paper. This study was funded by the National Science Foundation (OCE 10-41270 and 14-15268) and the Moorea Coral Reef LTER (OCE 04-17413 and 10-26852). This is contribution number 235 of the CSUN Marine Biology Program.

## References

- Albright, R., and Langdon, C. 2011. Ocean acidification impacts multiple early life history processes of the Caribbean coral *Porites astreoides*. *Global Change Biology*, 17: 2478–2487.
- Allemand, D., Furla, P., and Bénazet-Tambuté, S. 1998. Mechanisms of carbon acquisition for endosymbiont photosynthesis in *Anthozoa*. *Canadian Journal of Botany*, 76: 925–941.
- Anthony, K. R. N., Kline, D. I., Diaz-Pulido, G., Dove, S., and Hoegh-Guldberg, O. 2008. Ocean acidification causes bleaching and productivity loss in coral reef builders. *Proceedings of the National Academy of Sciences*, 105: 17442–17446.
- Barott, K. L., Venn, A. A., Perez, S. O., Tambuté, S., and Tresguerres, M. 2015. Coral host cells acidify symbiotic algal microenvironment to promote photosynthesis. *Proceedings of the National Academy of Sciences of the United States of America*, 112: 607–612.
- Barnes, D. J., and Chalker, B. E. 1990. Calcification and photosynthesis in reef-building corals and algae. *In Coral Reefs Ecosystems of the World*, Vol. 25, pp. 109–131. Ed. by Z. Dubinsky. Elsevier, Amsterdam.
- Borowitzka, M. A., and Larkum, A. W. D. 1987. Calcification in algae: mechanisms and the role of metabolism. *Critical Reviews in Plant Sciences*, 6: 1–45.
- Chalker, B. E. 1981. Simulating light-saturation curves for photosynthesis and calcification by reef-building corals. *Marine Biology*, 63: 135–141.
- Chisholm, J. R. M. 2003. Primary productivity of reef-building crustose coralline algae. *Limnology and Oceanography*, 48: 1376–1387.
- Comeau, S., Edmunds, P. J., Spindel, N. B., and Carpenter, R. C. 2013. The responses of eight coral reef calcifiers to increasing partial pressure of CO<sub>2</sub> do not exhibit a tipping point. *Limnology and Oceanography*, 58: 388–398.
- Comeau, S., Edmunds, P. J., Spindel, N. B., and Carpenter, R. C. 2014. Fast coral reef calcifiers are more sensitive to ocean acidification in short-term laboratory incubations. *Limnology and Oceanography*, 59: 1081–1091.
- Cornwall, C. E., Hepburn, C. D., McGraw, C. M., Currie, K. I., Pilditch, C. A., Hunter, K. A., Boyd, F. W., *et al.* 2013. Diurnal fluctuations in seawater pH influence the response of a calcifying macroalga to ocean acidification. *Proceedings of the Royal Society B: Biological Sciences*, 280: 20132201. doi:10.1098/rspb.2013.2201.
- Cornwall, C. E., Hepburn, C. D., Pritchard, D., Currie, K. I., McGraw, C. M., Hunter, K. A., and Hurd, C. L. 2012. Carbon-use strategies in macroalgae: differential responses to lowered pH and implications for ocean acidification. *Journal of Phycology*, 48: 137–144.
- Crawley, A., Kline, D. I., Dunn, S., Anthony, K., and Dove, S. 2010. The effect of ocean acidification on symbiont photorespiration and productivity in *Acropora formosa*. *Global Change Biology*, 16: 851–863.
- De Beer, D., and Larkum, A. W. D. 2001. Photosynthesis and calcification in the calcifying algae *Halimeda discoidea* studied with micro-sensors. *Plant, Cell and Environment*, 24: 1209–1217.
- Dickson, A. G., Sabine, C. L., and Christian, J. R. 2007. Guide to best practices for ocean CO<sub>2</sub> measurements. PICES Special Publication 3. PICES, Sidney, BC.
- Digby, P. S. B. 1977. Growth and calcification in the coralline algae, *Clathromorphum circumscriptum* and *Corallina officinalis*, and the significance of pH in relation to precipitation. *Journal of the Marine Biological Association of the United Kingdom*, 57: 1095–1109.
- Edmunds, P. 2012. Effect of pCO<sub>2</sub> on the growth, respiration, and photo-physiology of massive *Porites* spp. in Moorea, French Polynesia. *Marine Biology*, 159: 2149–2160.
- Egilsdottir, H., Noisette, F., Noël, L. M., Olafsson, J., and Martin, S. 2012. Effects of pCO<sub>2</sub> on physiology and skeletal mineralogy in a tidal pool coralline alga *Corallina elongata*. *Marine Biology*, 160: 2103–2112.
- Feely, R. A., Sabine, C. L., Lee, K., Berelson, W., Kleypas, J., Fabry, V. J., and Millero, F. J. 2004. Impact of anthropogenic CO<sub>2</sub> on the CaCO<sub>3</sub> system in the oceans. *Science*, 305: 362–366.
- Frankignoulle, M., Canon, C., and Gattuso, J.-P. 1994. Marine calcification as a source of carbon dioxide: positive feedback of increasing atmospheric CO<sub>2</sub>. *Limnology and Oceanography*, 39: 458–462.
- Furla, P., Galgani, I., Durand, I., and Allemand, D. 2000. Sources and mechanisms of inorganic carbon transport for coral calcification and photosynthesis. *The Journal of Experimental Biology*, 203: 3445–3457.
- Gattuso, J.-P., Epitalon, J.-M., and Lavigne, H. 2015. seacarb: seawater carbonate chemistry. R package version 3.0.6. <http://CRAN.R-project.org/package=seacarb> (last accessed November 2015).
- Herfort, L., Thake, B., and Taubner, I. 2008. Bicarbonate stimulation of calcification and photosynthesis in two hermatypic corals. *Journal of Phycology*, 44: 91–98.
- Hofmann, L., Yildiz, G., Hanelt, D., and Bischof, K. 2012. Physiological responses of the calcifying rhodophyte, *Corallina officinalis* (L.), to future CO<sub>2</sub> levels. *Marine Biology*, 159: 783–792.
- Hofmann, L. C., and Bischof, K. 2014. Ocean acidification effects on calcifying macroalgae. *Aquatic Biology*, 22: 261–279.
- Inoue, S., Kayanne, H., Yamamoto, S., and Kurihara, H. 2013. Spatial community shift from hard to soft corals in acidified water. *Nature Climate Change*, 3: 683–687.
- Johnson, M. D., Moriarty, V. W., and Carpenter, R. C. 2014. Acclimatization of the crustose coralline alga *Porolithon onkodes* to variable pCO<sub>2</sub>. *PLoS ONE*, 9: e87678.
- Jokiel, P. L. 2011. The reef coral two compartment proton flux model: a new approach relating tissue-level physiological processes to gross corallum morphology. *Journal of Experimental Marine Biology and Ecology*, 409: 1–12.
- Kaniewska, P., Campbell, P. R., Kline, D. I., Rodriguez-Lanetty, M., Miller, D. J., Dove, S., and Hoegh-Guldberg, O. 2012. Major cellular and physiological impacts of ocean acidification on a reef building coral. *PLoS ONE*, 7: e34659. doi:10.1371/journal.pone.0034659.
- Kirschbaum, M. U. F. 1994. The sensitivity of C<sub>3</sub> photosynthesis to increasing CO<sub>2</sub> concentration: a theoretical analysis of its dependence

- on temperature and background CO<sub>2</sub> concentration. *Plant, Cell and Environment*, 17: 747–754.
- Kroeker, K. J., Kordas, R. L., Crim, R., Hendriks, I. E., Ramajo, L., Singh, G. S., Duarte, C. M., *et al.* 2013. Impacts of ocean acidification on marine organisms: quantifying sensitivities and interaction with warming. *Global Change Biology*, 19: 1884–1896.
- Leclercq, N., Gattuso, J.-P., and Jaubert, J. 2002. Primary production, respiration, and calcification of a coral reef mesocosm under increased CO<sub>2</sub> partial pressure. *Limnology and Oceanography*, 47: 558–564.
- Leggat, W., Badger, M. R., and Yellowlees, D. 1999. Evidence for an inorganic carbon-concentrating mechanism in the symbiotic dinoflagellate *Symbiodinium* sp. *Plant Physiology*, 121: 1247–1255.
- Mackey, K. R. M., Morris, J. J., Morel, F. M. M., and Kranz, S. A. 2015. Response of photosynthesis to ocean acidification. *Oceanography*, 28: 74–91.
- Marsh, J. A. 1970. Primary productivity of reef-building calcareous red algae. *Ecology*, 51: 255–263.
- Martin, S., Cohu, S., Vignot, C., Zimmerman, G., and Gattuso, J.-P. 2013. One-year experiment on the physiological response of the Mediterranean crustose coralline alga, *Lithophyllum cabiochae*, to elevated pCO<sub>2</sub> and temperature. *Ecology and Evolution*, 3: 676–693.
- Marubini, F., Ferrier-Pagès, C., Furla, P., and Allemand, D. 2008. Coral calcification responds to seawater acidification: a working hypothesis towards a physiological mechanism. *Coral Reefs*, 27: 491–499.
- McCulloch, M., Falter, J., Trotter, J., and Montagna, P. 2012. Coral resilience to ocean acidification and global warming through pH up-regulation. *Nature Climate Change*, 2: 623–627.
- Moss, R. H., Edmonds, J. A., Hibbard, K. A., Manning, M. R., Rose, S. K., van Vuuren, D. P., Carter, T. R., *et al.* 2010. The next generation of scenarios for climate change research and assessment. *Nature*, 463: 747–756.
- Noisette, F., Duong, G., Six, C., Davoult, D., and Martin, S. 2013. Effects of elevated pCO<sub>2</sub> on the metabolism of a temperate rhodolith *Lithothamnion corallioides* grown under different temperatures. *Journal of Phycology*, 49: 746–757.
- Norby, R. J., DeLucia, E. H., Gielen, B., Calfapietra, C., Giardina, C. P., King, J. S., Ledford, J., *et al.* 2005. Forest response to elevated CO<sub>2</sub> is conserved across a broad range of productivity. *Proceedings of the National Academy of Sciences*, 102: 18052–18056.
- Pan, T.-C. F., Applebaum, S. L., and Manahan, D. T. 2015. Experimental ocean acidification alters the allocation of metabolic energy. *Proceedings of the National Academy of Sciences of the United States of America*, 112: 4696–4701.
- Patterson, M. R. 1992. A chemical engineering view of cnidarian symbioses. *American Zoologist*, 32: 566–582.
- Pörtner, H. O., Langenbuch, M., and Reipschläger, A. 2004. Biological impact of elevated ocean CO<sub>2</sub> concentrations: lessons from animal physiology and earth history. *Journal of Oceanography*, 60: 705–718.
- Reynaud, S., Leclercq, N., Romaine-Lioud, S., Ferrier-Pagès, C., Jaubert, J., and Gattuso, J. 2003. Interacting effects of CO<sub>2</sub> partial pressure and temperature on photosynthesis and calcification in a scleractinian coral. *Global Change Biology*, 9: 1660–1668.
- Ries, J. B., Cohen, A. L., and McCorkle, D. C. 2009. Marine calcifiers exhibit mixed responses to CO<sub>2</sub>-induced ocean acidification. *Geology*, 37: 1131–1134.
- Rivest, E. B., and Hofmann, G. E. 2014. Responses of the metabolism of the larvae of *Pocillopora damicornis* to ocean acidification and warming. *PLoS ONE*, 9: e96172. doi:10.1371/journal.pone.0096172.
- Rodolfo-Metalpa, R., Martin, S., Ferrier-Pagès, C., and Gattuso, J.-P. 2010. Response of the temperate coral *Cladocora caespitosa* to mid- and long-term exposure to pCO<sub>2</sub> and temperature levels projected for the year 2100 AD. *Biogeosciences*, 7: 289–300.
- Semesi, I. S., Kangwe, J., and Björk, M. 2009. Alterations in seawater pH and CO<sub>2</sub> affect calcification and photosynthesis in the tropical coralline alga, *Hydrolithon* sp. (*Rhodophyta*). *Estuarine, Coastal and Shelf Science*, 84: 337–341.
- Schneider, K., and Erez, J. 2006. The effect of carbonate chemistry on calcification and photosynthesis in the hermatypic coral *Acropora eurystoma*. *Limnology and Oceanography*, 51: 1284–1293.
- Sinutok, S., Hill, R., Doblin, M. A., Wuhrer, R., and Ralph, P. J. 2011. Warmer more acidic conditions cause decreased productivity and calcification in subtropical coral reef sediment-dwelling calcifiers. *Limnology and Oceanography*, 56: 1200–1212.
- Stambler, N. 2011. Zooxanthellae: the yellow symbionts inside animals. *In* *Coral Reefs: An Ecosystem in Transition*, pp. 87–106. Ed. by Z. Dubinsky, and N. Stambler. Springer, Berlin, Germany.
- Stimson, J., and Kinzie, R. A., III. 1991. The temporal pattern and rate of release of zooxanthellae from the reef coral *Pocillopora damicornis* (Linnaeus) under nitrogen-enrichment and control conditions. *Journal of Experimental Marine Biology and Ecology*, 153: 63–74.
- Strahl, J., Stolz, I., Uthicke, S., Vogel, N., Noonan, S. H. C., and Fabricius, K. E. 2015. Physiological and ecological performance differs in four coral taxa at a volcanic carbon dioxide seep. *Comparative Biochemistry and Physiology Part A: Molecular and Integrative Physiology*, 184: 179–186.
- Takahashi, A., and Kurihara, H. 2013. Ocean acidification does not affect the physiology of the tropical coral *Acropora digitifera* during a 5-week experiment. *Coral Reefs*, 32: 305–314.
- Thomsen, J., and Melzner, F. 2010. Moderate seawater acidification does not elicit long-term metabolic depression in the blue mussel *Mytilus edulis*. *Marine Biology*, 157: 2667–2676.
- Vogel, N., Fabricius, K. E., Strahl, J., Noonan, S. H. C., Wild, C., and Uthicke, S. 2015. Calcareous green alga *Halimeda* tolerates ocean acidification conditions at tropical carbon dioxide seeps. *Limnology and Oceanography*, 60: 263–275.
- Yildiz, G., Hofmann, L. C., and Bischof, K. D. 2013. Ultraviolet radiation modulates the physiological responses of the calcified rhodophyte *Corallina officinalis* to elevated CO<sub>2</sub>. *Botanica Marina*, 56: 161–168.
- Zoccola, D., Ganot, P., Bertucci, A., Caminiti-Segonds, N., Techer, N., Voolstra, C. R., Aranda, M., *et al.* 2015. Bicarbonate transporters in corals point towards a key step in the evolution of cnidarian calcification. *Scientific Reports*, 5: 09983, doi: 10.1038/srep09983.

Handling editor: Joanna Norkko
